# Supplementary material for: The Impact of Environmental, Social, and Governance Disclosure on the Performance of Saudi Arabian Companies: Evidence from the Top 100 Non-Financial Companies Listed on Tadawul
Source: Preprints.org preprint supplement (doi:10.20944/preprints202407.1296.v2), 2024-08-30
Supplement: Supplementary file 1 [file supplementary]

**From:** [مها ه المرزوقي زس جماع](#)  
**To:**  
**Subject:** Fwd: \*Fwd: Final stage Proofreading Request 28 August 2024 20:06:57  
**Date:** [Untitled attachment 00012.htm](#)  
**Attachments:** [english-82631-new.docx](#)

---

Sent from my iPhone

Begin forwarded message:

**From:** Author Services <authorservices@mdpi.com>  
**Date:** 28 August 2024 at 19:40:33 GMT+3  
**To:** Maha Abuhussain [الممرزوقي أبو حسين](mailto:malmarzouky@kau.edu.sa) <malmarzouky@kau.edu.sa>  
**Subject:** Re: \*Fwd: Final stage Proofreading Request

Dear Maha Abbas Almarzouky Abuhussain,

Thank you for your email. Please note that we have now re-edited the modified parts of your manuscript in line with our guarantee for customers of our Academic service. Please find attached the re-edited version, and don't hesitate to get in touch if you have any questions!

Kind regards,

---

Dr. Christopher Dacosta  
Author Services Coordinator, MDPI

MDPI UK Limited  
One New York Street  
Manchester  
M1 4HD  
UK  
[www.mdpi.com](http://www.mdpi.com)

The information and files contained in this message are confidential and intended solely for the use of the individual or entity to whom they are addressed. If you have received this message in error, please notify me and delete this message from your system. You may not copy this message in its entirety or in part, or disclose its contents to anyone.

Only official emails sent by MDPI (@mdpi.com) are valid. Please check that the sender's email is affiliated with @mdpi.com. We do not authorize any third party to provide email services. MDPI is the sole service provider, and therefore cannot be held liable for actions performed by any third party.

---

**From:** "Maha Abuhussain [الممرزوقي أبو حسين](mailto:malmarzouky@kau.edu.sa)" <malmarzouky@kau.edu.sa>  
**To:** "Author Services" <authorservices@mdpi.com>  
**Sent:** Wednesday, 28 August, 2024 16:43:21
